# Supplementary material
Source: Springer Nature journal article supplement (https://www.springermedizin.de/resource/supplementary/13063_2009_387_MOESM3_ESM.pdf/9618120)

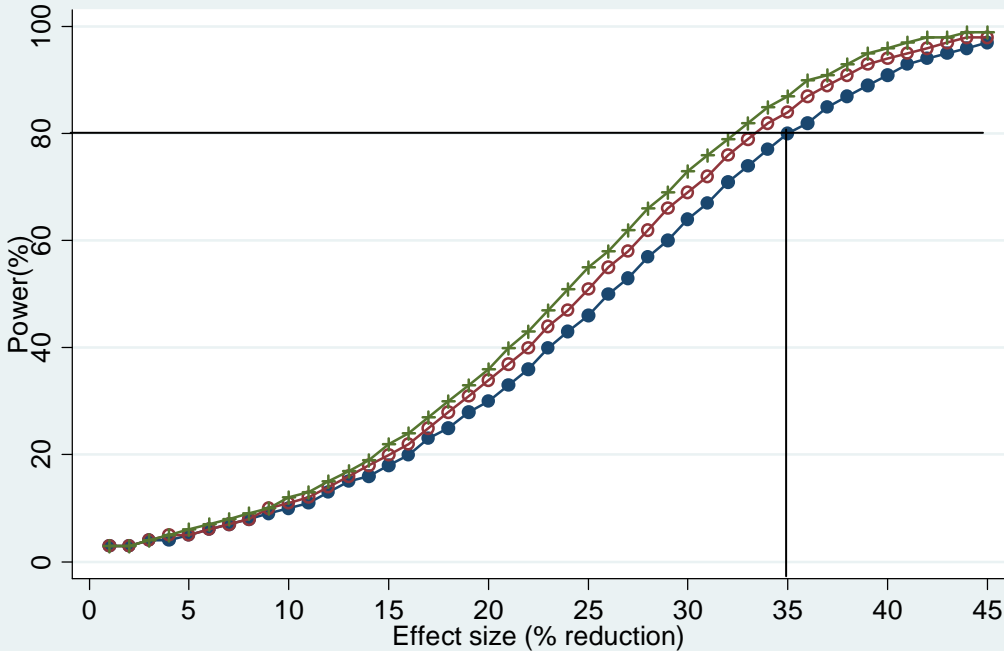

—●— 4.0% incidence    —○— 4.5% incidence    —+— 5.0% incidence

Assuming 80% retention at week 52

Supplement: MOESM3 [file 9618120]
